# Supplementary material for: Optimized In Vitro CRISPR/Cas9 Gene Editing Tool in the West Nile Virus Mosquito Vector, Culex quinquefasciatus
Source: MDPI journal article supplement (doi:10.3390/insects13090856), 2022-09-19
Supplement: s1 [file s1]

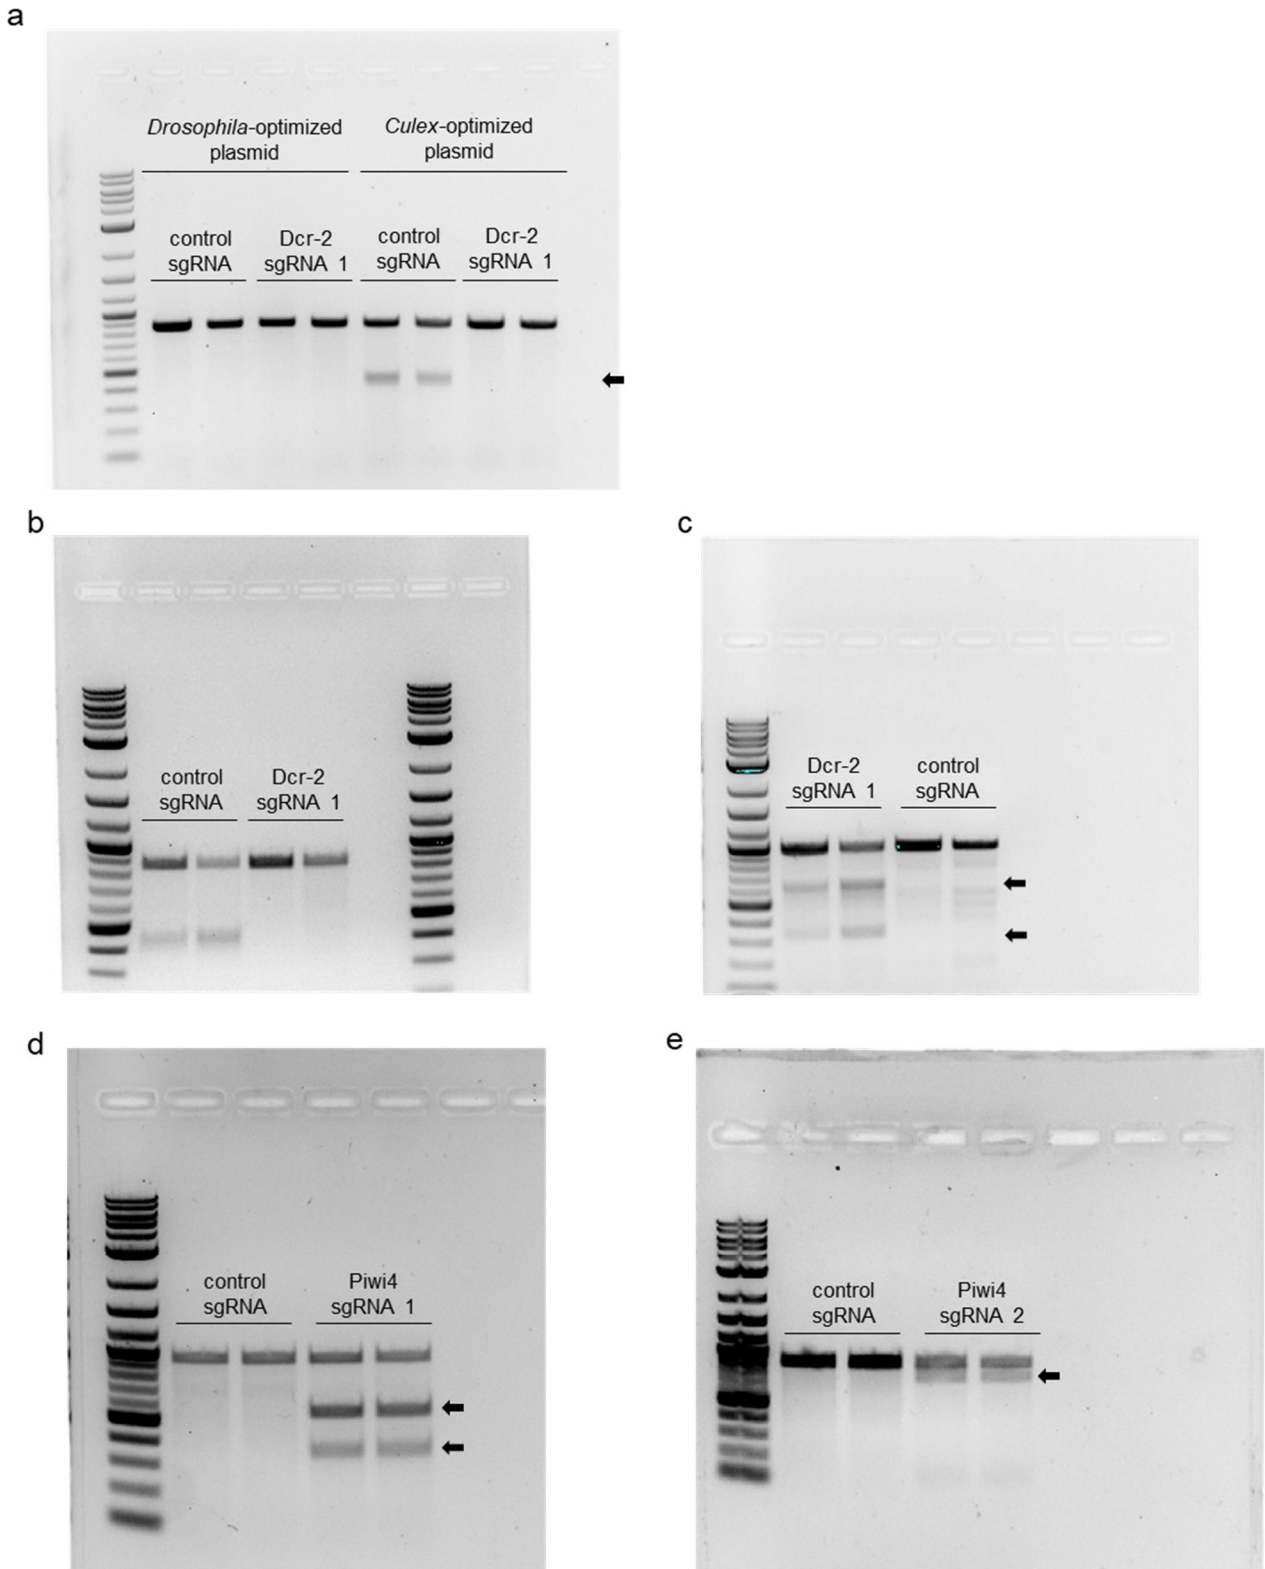

**Figure S1.** Original agarose gel electrophoresis images following T7 Endonuclease I (T7EI) assay used to generate main text Figure 3b (a), Figure 4 (b, c), and Figure 5 (d, e). Black arrows indicate T7-cleaved products.

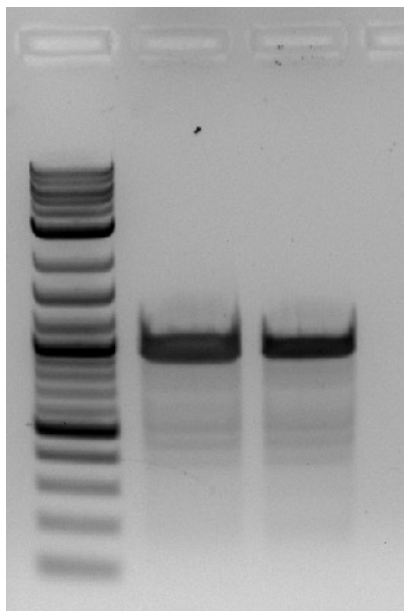

**Figure S2.** T7 Endonuclease I (T7EI) assay of the *dcr-2* genomic region targeted by sgRNA2 performed on untreated Hsu. Duplicate gDNA samples were used. Non-specific bands were observed, comparable to those in the 'control sgRNA' treated samples in Figure 4.
